# Supplementary material
Source: Elsevier journal article supplement (https://www.sciencedirect.com/science/article/pii/S1885585719303305)

## SUPPLEMENTARY DATA

**Table 1 of the supplementary data**

Hospital typology and availability of ICCU from 2005 to 2015

| Year | Types of hospital |         |      |         |      | Total*     |
|------|-------------------|---------|------|---------|------|------------|
|      | 1 & 2             | 3       |      | 4       |      |            |
|      |                   | No ICCU | ICCU | No ICCU | ICCU |            |
| 2005 | 117               | 29      | 3    | 21      | 19   | <b>189</b> |
|      | 62%               | 15%     | 2%   | 11%     | 10%  |            |
| 2006 | 121               | 33      | 3    | 21      | 19   | <b>197</b> |
|      | 61%               | 17%     | 2%   | 11%     | 10%  |            |
| 2007 | 129               | 39      | 3    | 21      | 19   | <b>211</b> |
|      | 61%               | 18%     | 1%   | 10%     | 9%   |            |
| 2008 | 137               | 31      | 4    | 22      | 19   | <b>213</b> |
|      | 64%               | 15%     | 2%   | 10%     | 9%   |            |
| 2009 | 112               | 42      | 5    | 23      | 19   | <b>201</b> |
|      | 56%               | 21%     | 2%   | 11%     | 9%   |            |
| 2010 | 123               | 41      | 5    | 22      | 19   | <b>210</b> |
|      | 59%               | 20%     | 2%   | 10%     | 9%   |            |
| 2011 | 119               | 42      | 5    | 23      | 19   | <b>208</b> |
|      | 57%               | 20%     | 2%   | 11%     | 9%   |            |
| 2012 | 108               | 48      | 5    | 23      | 19   | <b>203</b> |
|      | 53%               | 24%     | 2%   | 11%     | 9%   |            |
| 2013 | 117               | 46      | 5    | 22      | 21   | <b>211</b> |
|      | 55%               | 22%     | 2%   | 10%     | 10%  |            |
| 2014 | 118               | 44      | 5    | 21      | 21   | <b>209</b> |
|      | 56%               | 21%     | 2%   | 10%     | 10%  |            |
| 2015 | 111               | 44      | 5    | 21      | 21   | <b>202</b> |
|      | 55%               | 22%     | 2%   | 10%     | 10%  |            |

ICCU, intensive cardiac care unit.

\*Type 5 hospital (with catheterization laboratory and/or cardiac surgery without cardiology department) not included.

### Table 2 of the supplementary data

Variables independently associated with in-hospital, all-cause, mortality adjusted by risk in a multilevel logistic regression model for CS-STEMI

|                                                                                                       | OR   | <i>P</i> | 95%CI |      |
|-------------------------------------------------------------------------------------------------------|------|----------|-------|------|
| Women                                                                                                 | 1.16 | < .001   | 1.08  | 1.25 |
| Age (per y increase)                                                                                  | 1.05 | < .001   | 1.05  | 1.05 |
| History of CABG surgery (ICD-9 codes V45.81)                                                          | 1.78 | < .001   | 1.30  | 2.45 |
| Renal failure (CC 131)                                                                                | 1.30 | < .001   | 1.20  | 1.41 |
| Diabetes mellitus or diabetes mellitus complications except proliferative retinopathy (CC 15-20. 120) | 1.13 | < .001   | 1.05  | 1.21 |
| Dementia or other specified brain disorders (CC 49-50)                                                | 1.85 | < .001   | 1.61  | 2.12 |
| Vascular disease and complications (CC 104-105)                                                       | 3.08 | < .001   | 1.85  | 5.12 |

95%CI, 95% confidence interval; CABG, coronary artery bypass grafting; CC, condition categories;

CS-STEMI, cardiogenic shock-ST-segment elevation myocardial infarction; ICD-9, International Classification of Diseases-9th Revision; OR, odds ratio.

Secondary diagnoses grouped in risk factors (Pope et al.).<sup>1</sup>

### Table 3 of the supplementary data

Variables independently associated with in-hospital, all-cause mortality adjusted by risk in a multilevel logistic regression model for CS-STEMI including percutaneous and surgical coronary revascularization procedures from 2005 to 2015. Hospital types 3 and 4

|                                                                                                       | OR   | P   | 95%CI |      |
|-------------------------------------------------------------------------------------------------------|------|-----|-------|------|
| Women                                                                                                 | 1.11 | .03 | 1.01  | 1.23 |
| Age (per y increase)                                                                                  | 1.04 | .00 | 1.04  | 1.05 |
| PCI                                                                                                   | 0.29 | .00 | 0.26  | 0.32 |
| CABG                                                                                                  | 0.25 | .00 | 0.19  | 0.32 |
| History of CABG surgery (ICD-9 codes V45.81)                                                          | 1.77 | .02 | 1.10  | 2.84 |
| Renal failure (CC 131)                                                                                | 1.50 | .00 | 1.36  | 1.66 |
| Diabetes mellitus or diabetes mellitus complications except proliferative retinopathy (CC 15-20. 120) | 1.15 | .01 | 1.04  | 1.26 |
| Dementia or other specified brain disorders (CC 49-50)                                                | 1.83 | .00 | 1.52  | 2.20 |
| Vascular disease and complications (CC 104-105)                                                       | 3.98 | .00 | 2.10  | 7.53 |

95%CI, 95% confidence interval, CC, condition categories; CS-STEMI, cardiogenic shock-ST-segment elevation myocardial infarction; ICCU, intensive cardiac care unit; PCI, percutaneous coronary intervention; CABG, coronary artery bypass grafting. OR: odds ratio.

Secondary diagnoses grouped in risk factors (Pope et al.).<sup>1</sup>

### REFERENCES

1. Pope GC, Ellis RP, Ash AS, et al. *Diagnostic Cost Group Hierarchical Condition Category Models for Medicare Risk Adjustment*. Final Report to the Health Care Financing Administration under Contract Number 500-95-048. Health Economics Research, Inc. Waltham, MA. December, 2000b.

**Figure 1 of the supplementary data.** Number of hospitals by type and year.

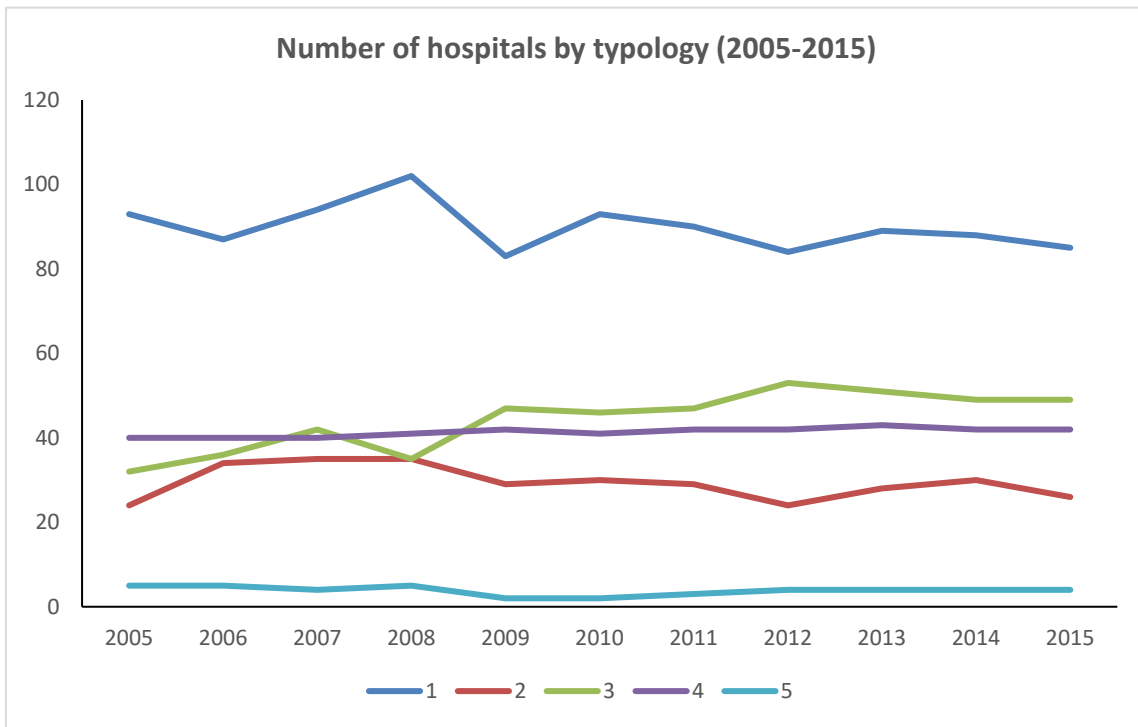

Supplement: mmc1 [file S1885585719303305:mmc1.pdf]
